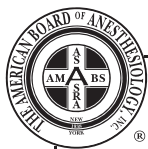

## THE AMERICAN BOARD OF ANESTHESIOLOGY

### EXAMINATIONS IN SUBSPECIALTY CERTIFICATION

#### Critical Care Medicine and Pain Medicine

The American Board of Anesthesiology (ABA) will administer examinations for certification in the subspecialties of critical care medicine and pain medicine on Saturday, October 23, 2010, *via* computer at more than 300 Prometric<sup>®</sup>, a part of the Thomson Corporation, Testing Centers located throughout the United States, Canada, and the U.S. Territories. The ABA will mail scheduling permits to candidates approximately three months prior to the exam.

All applicants for subspecialty certification must satisfactorily complete 12 months of training in an ACGME-accredited critical care medicine or pain medicine program by September 30, 2010. They also must be certified in anesthesiology by the ABA or scheduled for ABA oral examination in 2010. After February 1, 2010, applicants may use the ABA Web site ([www.theABA.org](http://www.theABA.org)) to submit their application for a subspecialty certification examination electronically. The standard application deadline is March 31, 2010. The ABA will consider late applications received by April 15, 2010. Applications received after the late deadline will not be considered. The ABA will make a decision about an applicant's qualifications for subspecialty examination by May 15, 2010.

#### Hospice and Palliative Medicine

The examination for certification in hospice and palliative medicine is offered biennially. The 2010 examination will take place on November 16, 2010, and will be administered *via* computer at more than 200 Pearson VUE test centers (please note this exam date is subject to change). The ABA will inform candidates when they may schedule their examination with Pearson VUE.

Applicants for subspecialty certification who have satisfactorily completed 12 months of training in an ACGME-accredited hospice and palliative medicine fellowship program may be admitted to the examination *via* temporary criteria. The temporary criteria include a Training Pathway and a Practice Pathway. For additional information please refer to Section 3 of the ABA Booklet of Information available on the ABA Web site at [www.theABA.org](http://www.theABA.org) under the Publications link.

Applicants also must be certified in anesthesiology by the ABA or scheduled for ABA oral examination in 2010. After February 1, 2010, applicants may use the ABA Web site ([www.theABA.org](http://www.theABA.org)) to submit their application for a subspecialty certification examination electronically. The standard application deadline is March 31, 2010. The ABA will consider late applications received by April 15, 2010. Applications received after the late deadline will not be considered. The ABA will make a decision about an applicant's qualifications for subspecialty examination by May 15, 2010.

## THE AMERICAN BOARD OF ANESTHESIOLOGY

### EXAMINATIONS IN SUBSPECIALTY RECERTIFICATION

#### Critical Care Medicine and Pain Medicine

The American Board of Anesthesiology (ABA) will administer examinations for recertification in the subspecialties of critical care medicine and pain medicine from October 30 to November 13, 2010 (except Sundays). The examinations will be administered *via* computer at more than 300 Prometric<sup>®</sup>, a part of the Thomson Corporation, Testing Centers located throughout the United States, Canada, and the U.S. Territories. The ABA will mail scheduling permits to candidates approximately three months prior to the exam.

Physicians previously certified in critical care medicine or pain medicine by the ABA may apply to recertify in the subspecialty. After February 1, 2010, applicants may use the ABA Web site ([www.theABA.org](http://www.theABA.org)) to submit their application for a subspecialty recertification examination electronically. The standard application deadline is March 31, 2010. The ABA will consider late applications received by April 15, 2010. Applications received after the late deadline will not be considered. The ABA will make a decision about an applicant's qualifications for subspecialty examination by May 15, 2010.
